# Supplementary material for: Pulsed Plasma in Liquid Synthesis of Nickel Nanoparticles: Solvent-Dependent Phase Evolution from Carbon-Dissolved fcc-Ni to Ni₃C
Source: Research Square preprint supplement (doi:10.21203/rs.3.rs-7783106/v1), 2025-10-23
Supplement: Supplementary file 1 [file 1e90b18e291a93b5ff3a36c1.xlsx]

## Sheet: Table 1
	Table 1 The solvent volume ratio and XRD analysis results for all samples.
	Sample	Solution (vol%)			Products	afcc (nm)	C content (at%)
	A	UPW (100)			FCC + NiO	0.3521(3)	-
	B-1	UPW (90)	EG (10)		FCC + NiO	0.3522(3)	-
	B-2	UPW (80)	EG (20)		FCC + NiO	0.3521(3)	-
	B-3	UPW (70)	EG (30)		FCC + NiO	0.3521(3)	-
	B-4	UPW (60)	EG (40)		FCC + NiO	0.3522(3)	-
	B-5	UPW (50)	EG (50)		FCC	0.3521(3)	-
	C-1	UPW (45)	EG (45)	EtOH (10)	C-FCC	0.3524(3)	0.43(39)
	C-2	UPW (40)	EG (40)	EtOH (20)	C-FCC	0.3526(3)	0.69(39)
	C-3	UPW (35)	EG (35)	EtOH (30)	C-FCC	0.3527(3)	0.82(39)
	C-4	UPW (30)	EG (30)	EtOH (40)	C-FCC	0.3533(3)	1.60(38)
	C-5	UPW (25)	EG (25)	EtOH (50)	C-FCC	0.3541(3)	2.61(38)
	C-6	UPW (20)	EG (20)	EtOH (60)	C-FCC	0.3547(3)	3.36(37)
	C-7	UPW (15)	EG (15)	EtOH (70)	C-FCC	0.3556(3)	4.46(36)
	C-8	UPW (10)	EG (10)	EtOH (80)	C-FCC + Ni3C	0.3565(3)	5.53(35)
	C-9	UPW (5)	EG (5)	EtOH (90)	C-FCC + Ni3C	0.3577(3)	6.93(34)
	D	Xylene (100)			C-FCC + Ni3C	0.3600(3)	9.49(32)
